# Supplementary material for: Visible-Light Active Flexible and Durable Photocatalytic Antibacterial Ethylene-co-vinyl Acetate—Ag/AgCl/α-Fe2O3 Composite Coating
Source: MDPI journal article supplement (doi:10.3390/nano12121984), 2022-06-09
Supplement: s1 [file s1]

# Visible-Light Active Flexible and Durable Photocatalytic Antibacterial Ethylene-co-vinyl acetate—Ag/AgCl/ $\alpha$ -Fe<sub>2</sub>O<sub>3</sub> Composite Coating

Svetlana Vihodceva <sup>1,\*</sup>, Andris Šutka <sup>1</sup>, Maarja Otsus <sup>2</sup>, Heiki Vija <sup>2</sup>, Liga Grase <sup>1</sup>, Anne Kahru <sup>2,3,\*</sup> and Kaja Kasemets <sup>2,\*</sup>

<sup>1</sup> The Institute of Materials and Surface Engineering, Faculty of Materials Science and Applied Chemistry, Riga Technical University, 7 Paula Valdena Str., LV-1048 Riga, Latvia; andris.sutka@rtu.lv (A.Š.); liga.grase@rtu.lv (L.G.)

<sup>2</sup> National Institute of Chemical Physics and Biophysics, Laboratory of Environmental Toxicology, Akadeemia tee 23, 12618 Tallinn, Estonia; maarja.otsus@kbfi.ee (M.O.); heiki.vija@kbfi.ee (H.V.)

<sup>3</sup> Estonian Academy of Sciences, Kohtu 6, 10130 Tallinn, Estonia

\* Correspondence: svetlana.vihodceva@rtu.lv (S.V.); anne.kahru@kbfi.ee (A.K.); kaja.kasemets@kbfi.ee (K.K.)

*1.1. pH of the Ag/AgCl/ $\alpha$ -Fe<sub>2</sub>O<sub>3</sub> composite in 1:500 NB.*

Ag/AgCl/ $\alpha$ -Fe<sub>2</sub>O<sub>3</sub> composite in 1:500 NB solution 4 g/L - pH 6.27.

*1.2. FESEM images and XRD pattern of EVA-hematite coating and hematite particles.*

FESEM images show that synthesized hematite particles have nanowire shape (Figure S1 A-B). The XRD studies indicate that the hematite phase was successfully obtained by so-precipitation synthesis and annealing at 800 °C (Figure S1 C).

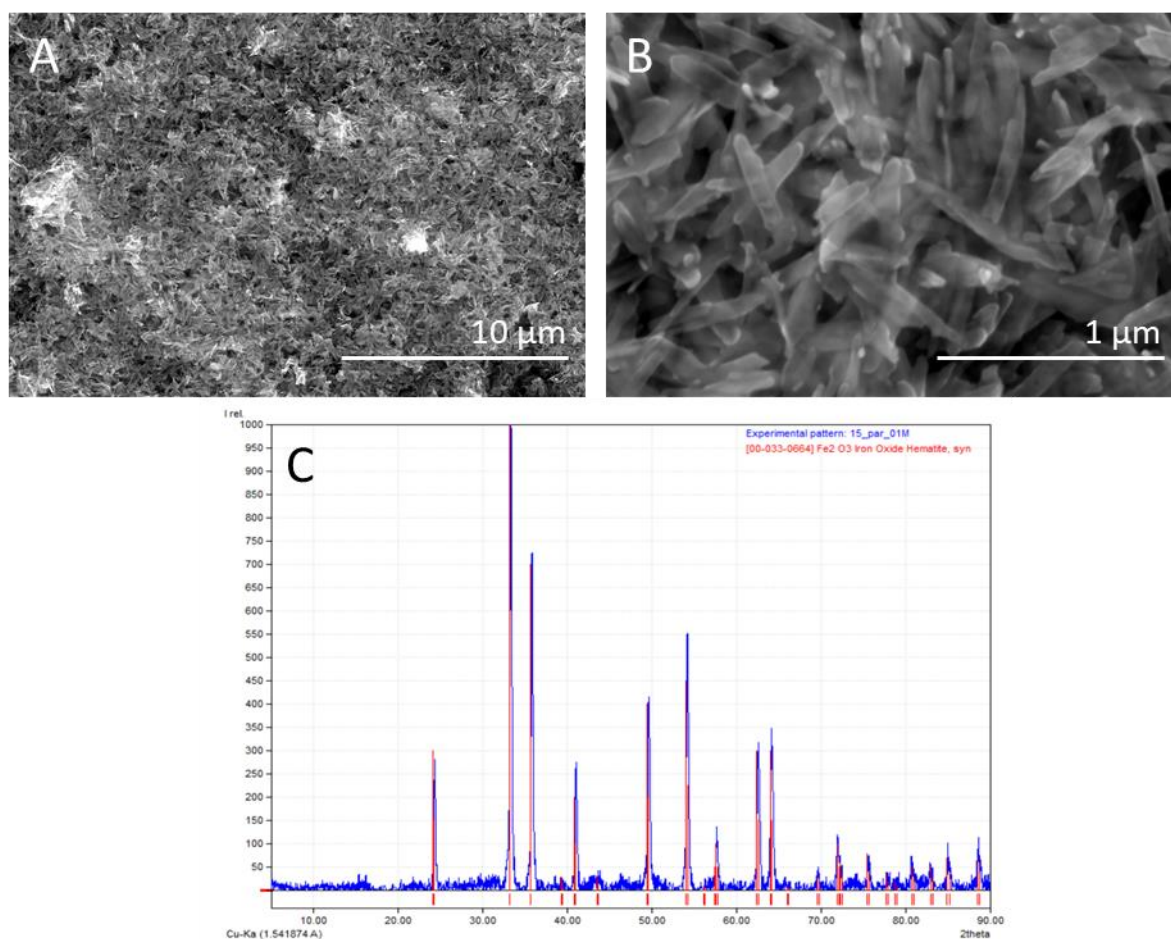

**Figure S1.** FESEM images EVA-hematite coating (A), α-Fe<sub>2</sub>O<sub>3</sub> nanowires at high resolution (B) and XRD pattern of the α-Fe<sub>2</sub>O<sub>3</sub> nanowires (C).

### 1.3. Bacteria in Suspension after Photocatalytic Tests.

To evaluate the presence of bacteria in suspensions after the photocatalytic test 200 μl of suspension from 24-well with EVA and EVA-Ag/AgCl/α-Fe<sub>2</sub>O<sub>3</sub> coated surfaces in the absence of illumination [D], and upon visible-light illumination [L] (Figure S2) was transferred to tube with 3 ml of undiluted Nutrient Broth, afterwards bacteria were grown on rotating shaker for 8 h at 30 °C. After 8 h tubes were evaluated visually and OD (600 nm) were measured. Results show that tube with suspension from EVA-Ag/AgCl/α-Fe<sub>2</sub>O<sub>3</sub>-L - upon visible-light illumination remain transparent with unchanged OD.

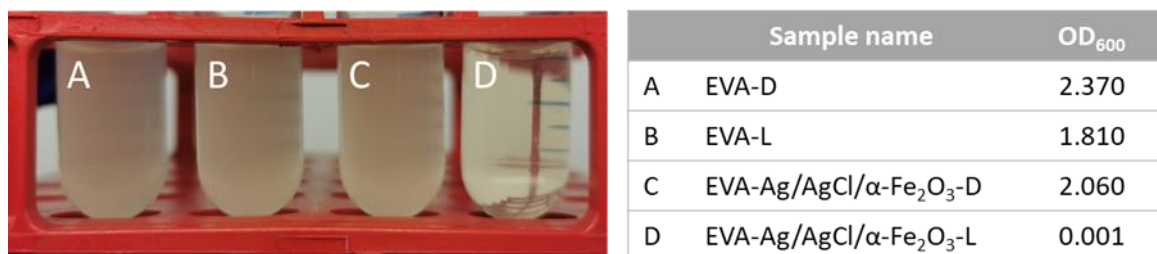

**Figure S2.** Visualization of the tubes and OD density after 8 h incubation at 30 °C temperature.
